# Supplementary material for: Contemporary Use and Outcomes of Arterial Closure Devices After Percutaneous Coronary Intervention: Insights From the Veterans Affairs Clinical Assessment, Reporting, and Tracking Program
Source: PubMed Central journal article supplement — J Am Heart Assoc. 2020 Feb 16;9(4):e015223. doi: 10.1161/JAHA.119.015223 (PMC7070201; doi:10.1161/jaha.119.015223), 2020-02-16

# **Supplemental Material**

**Table S1. Baseline clinical and procedural characteristics stratified by closure device in a propensity matched cohort.**

|                                      | Overall<br>(n=26,336) | ACD<br>(n=13,168) | No ACD<br>(n=13,168) | Standardized<br>Difference<br>(%) |
|--------------------------------------|-----------------------|-------------------|----------------------|-----------------------------------|
| Closure Device Type                  |                       |                   |                      | ---                               |
| Manual                               | 13,168 (50.0)         | ----              | 13,168 (100.0)       |                                   |
| Collagen Plug                        | 163 (0.6)             | 163 (1.2)         |                      |                                   |
| Extra Vascular Plug                  | 1 (0.0)               | 1 (0.0)           | ----                 |                                   |
| Seal                                 | 8,750 (33.2)          | 8,750 (66.4)      | ----                 |                                   |
| Starclose/Clip                       | 535 (2.0)             | 535 (4.1)         | ----                 |                                   |
| Suture                               | 3,719 (14.1)          | 3,719 (28.2)      | ----                 |                                   |
| Demographics                         |                       |                   |                      |                                   |
| Age, yrs (mean (sd))                 | 66.7 (9.4)            | 66.7 (9.4)        | 66.7 (9.3)           | 0.6                               |
| Male                                 | 25,808 (98.0)         | 12,903 (98.0)     | 12,905 (98.0)        | 0.1                               |
| White                                | 22,032 (83.7)         | 10,921 (82.9)     | 11,111 (84.4)        | 3.9                               |
| BMI (kg/m <sup>2</sup> ) (mean (sd)) | 29.9 (5.6)            | 29.9 (5.5)        | 29.9 (5.8)           | 0.1                               |
| Tobacco use                          | 16,730 (63.5)         | 8,195 (62.2)      | 8,535 (64.8)         | 5.4                               |
| Hypertension                         | 24,250 (92.1)         | 12,136 (92.2)     | 12,114 (92.0)        | 0.6                               |
| Hyperlipidemia                       | 23,753 (90.2)         | 11,861 (90.1)     | 11,892 (90.3)        | 0.8                               |
| Renal Failure (GFR<30)               | 1,536 (5.8)           | 753 (5.7)         | 783 (5.9)            | 1.0                               |
| Chronic Kidney Disease               | 6,747 (25.6)          | 3,348 (25.4)      | 3,399 (25.8)         | 0.9                               |
| Cerebrovascular Disease              | 5,516 (20.9)          | 2,767 (21.0)      | 2,749 (20.9)         | 0.3                               |
| Peripheral Arterial Disease          | 7,332 (27.8)          | 3,650 (27.7)      | 3,682 (28.0)         | 0.5                               |
| COPD                                 | 6,885 (26.1)          | 3,471 (26.4)      | 3,414 (25.9)         | 1.0                               |

|                              |               |              |              |     |
|------------------------------|---------------|--------------|--------------|-----|
| Diabetes                     | 13,401 (50.9) | 6,637 (50.4) | 6,764 (51.4) | 1.9 |
| Congestive Heart Failure     | 8,044 (30.5)  | 3,909 (29.7) | 4,135 (31.4) | 3.7 |
| Chronic Depression           | 8,083 (30.7)  | 4,046 (30.7) | 4,037 (30.7) | 0.1 |
| PTSD                         | 4,217 (16.0)  | 2,093 (15.9) | 2,124 (16.1) | 0.6 |
| Prior MI                     | 11,530 (43.8) | 5,644 (42.9) | 5,886 (44.7) | 3.7 |
| Prior PCI                    | 12,040 (45.7) | 6,037 (45.8) | 6,003 (45.6) | 0.5 |
| Prior CABG                   | 8,542 (32.4)  | 4,017 (30.5) | 4,525 (34.4) | 8.2 |
| Presentation Characteristics |               |              |              |     |
| Med IIbIIIa                  | 4,457 (16.9)  | 2,195 (16.7) | 2,262 (17.2) | 1.4 |
| Presentation Type            |               |              |              | 1.9 |
| STEMI                        | 1,889 (7.2)   | 949 (7.2)    | 940 (7.1)    |     |
| NSTEMI                       | 6,192 (23.5)  | 3,067 (23.3) | 3,125 (23.7) |     |
| Unstable Angina              | 6,439 (24.4)  | 3,229 (24.5) | 3,210 (24.4) |     |
| Stable Angina                | 7,518 (28.5)  | 3,769 (28.6) | 3,749 (28.5) |     |
| Chest Pain                   | 1,156 (4.4)   | 589 (4.5)    | 567 (4.3)    |     |
| Other*                       | 471 (1.8)     | 224 (1.7)    | 247 (1.9)    |     |
| Unknown                      | 2,378 (9.0)   | 1,191 (9.0)  | 1,187 (9.0)  |     |

- Data are presented as counts (percentages) unless otherwise noted.
- \*Other includes presentations for valve diseases, arrhythmia, asymptomatic, cardiomyopathy, heart failure, positive functional study, non-cardiac pre-op, pulmonary hypertension, syncope, and transplant evaluation

**Table S2. Facility characteristics by closure device use in the propensity matched cohort.**

|                                      | Overall<br>(n=26,336) | ACD<br>(n=13,168) | No ACD<br>(n=13,168) | Standardized<br>Difference<br>(%) |
|--------------------------------------|-----------------------|-------------------|----------------------|-----------------------------------|
| Region                               |                       |                   |                      | 8.3                               |
| Continental                          | 6,427 (24.4)          | 3,161 (24.0)      | 3,266 (24.8)         |                                   |
| Midwest                              | 7,131 (27.1)          | 3,576 (27.2)      | 3,555 (27.0)         |                                   |
| North Atlantic                       | 3,130 (11.9)          | 1,707 (13.0)      | 1,432 (10.8)         |                                   |
| Pacific                              | 3,736 (14.2)          | 1,918 (14.6)      | 1,818 (13.8)         |                                   |
| Southeast                            | 5,912 (22.4)          | 2,806 (21.3)      | 3,106 (23.6)         |                                   |
| Academic Affiliation                 | 26,008 (98.8)         | 13,000 (98.7)     | 13,008 (98.8)        | 0.5                               |
| Fellows Listed at Site               | 25,515 (96.9)         | 12,754 (96.9)     | 12,761 (96.9)        | 0.3                               |
| Operating Beds in FY2018 (mean (sd)) | 180.3 (69.2)          | 182.9 (72.6)      | 177.6 (65.5)         | 7.8                               |

**Table S3. Baseline clinical and procedural characteristics by high and low use of closure devices.**

|                                      | Overall<br>(n=20,883) | PCI by high-<br>use operator<br>(n=10,737) | PCI by low-<br>use operator<br>(n=10,146) | Standardized<br>Difference<br>(%) |
|--------------------------------------|-----------------------|--------------------------------------------|-------------------------------------------|-----------------------------------|
| Arterial Closure Device              | 12,502 (59.9)         | 10,065 (93.7)                              | 2,437 (24.0)                              | 200.8                             |
| Closure Device Type                  |                       |                                            |                                           | 202.0                             |
| Manual                               | 8,381 (40.1)          | 672 (6.3)                                  | 7,709 (76.0)                              |                                   |
| Collagen Plug                        | 286 (1.4)             | 266 (2.5)                                  | 20 (0.2)                                  |                                   |
| Seal                                 | 8,310 (39.8)          | 6,793 (63.3)                               | 1,517 (15.0)                              |                                   |
| Starclose/Clip                       | 549 (2.6)             | 469 (4.4)                                  | 80 (0.8)                                  |                                   |
| Suture                               | 3,357 (16.1)          | 2,537 (23.6)                               | 820 (8.1)                                 |                                   |
| Demographics                         |                       |                                            |                                           |                                   |
| Age, yrs (mean (sd))                 | 66.5 (9.4)            | 67.0 (9.5)                                 | 65.9 (9.2)                                | 11.6                              |
| Male                                 | 20,498 (98.2)         | 10,542 (98.2)                              | 9,956 (98.1)                              | 0.4                               |
| White                                | 17,781 (85.1)         | 9,168 (85.4)                               | 8,613 (84.9)                              | 1.4                               |
| BMI (kg/m <sup>2</sup> ) (mean (sd)) | 30.3 (5.7)            | 30.3 (5.7)                                 | 30.3 (5.7)                                | 0.6                               |
| Tobacco use                          | 13,447 (64.4)         | 6,956 (64.8)                               | 6,491 (64.0)                              | 1.7                               |
| Hypertension                         | 18,963 (90.8)         | 9,717 (90.5)                               | 9,246 (91.1)                              | 2.2                               |
| Hyperlipidemia                       | 18,963 (90.8)         | 9,796 (91.2)                               | 9,167 (90.4)                              | 3.1                               |
| Renal Failure (GFR<30)               | 1,064 (5.1)           | 570 (5.3)                                  | 494 (4.9)                                 | 2.0                               |
| Chronic Kidney Disease               | 5,031 (24.1)          | 2,704 (25.2)                               | 2,327 (22.9)                              | 5.3                               |
| Cerebrovascular Disease              | 4,034 (19.3)          | 2,150 (20.0)                               | 1,884 (18.6)                              | 3.7                               |
| Peripheral Arterial Disease          | 4,746 (22.7)          | 2,574 (24.0)                               | 2,172 (21.4)                              | 6.1                               |
| COPD                                 | 5,080 (24.3)          | 2,678 (24.9)                               | 2,402 (23.7)                              | 3.0                               |

|                              |               |              |              |      |
|------------------------------|---------------|--------------|--------------|------|
| Diabetes                     | 10,485 (50.2) | 5,427 (50.5) | 5,058 (49.9) | 1.4  |
| Congestive Heart Failure     | 5,995 (28.7)  | 3,164 (29.5) | 2,831 (27.9) | 3.5  |
| Chronic Depression           | 6,520 (31.2)  | 3,322 (30.9) | 3,198 (31.5) | 1.3  |
| PTSD                         | 3,515 (16.8)  | 1,814 (16.9) | 1,701 (16.8) | 0.3  |
| Prior MI                     | 8,996 (43.1)  | 4,716 (43.9) | 4,280 (42.2) | 3.5  |
| Prior PCI                    | 9,285 (44.5)  | 4,831 (45.0) | 4,454 (43.9) | 2.2  |
| Prior CABG                   | 6,499 (31.1)  | 3,243 (30.2) | 3,256 (32.1) | 4.1  |
| Presentation Characteristics |               |              |              |      |
| Med IIbIIIa                  | 3,271 (15.7)  | 1,380 (12.9) | 1,891 (18.6) | 15.9 |
| Outpatient PCI               | 126 (0.6)     | 63 (0.6)     | 63 (0.6)     | 0.4  |
| Presentation Type            |               |              |              | 13.7 |
| STEMI                        | 1,424 (6.8)   | 745 (6.9)    | 679 (6.7)    |      |
| NSTEMI                       | 5,194 (24.9)  | 2,902 (27.0) | 2,292 (22.6) |      |
| Unstable Angina              | 5,204 (24.9)  | 2,579 (24.0) | 2,625 (25.9) |      |
| Stable Angina                | 5,857 (28.0)  | 2,863 (26.7) | 2,994 (29.5) |      |
| Chest Pain                   | 860 (4.1)     | 403 (3.8)    | 457 (4.5)    |      |
| Other*                       | 416 (2.0)     | 261 (2.4)    | 155 (1.5)    |      |
| Unknown                      | 1,713 (8.2)   | 889 (8.3)    | 824 (8.1)    |      |

**Table S4. Facility characteristics by high and low closure device utilization.**

|                                      | Overall<br><b>(n=20,883)</b> | PCI by high-<br>use operator<br><b>(n=10,737)</b> | PCI by low-<br>use operator<br><b>(n=10,146)</b> | Standardized<br>Difference<br>(%) |
|--------------------------------------|------------------------------|---------------------------------------------------|--------------------------------------------------|-----------------------------------|
| Region                               |                              |                                                   |                                                  | 41.8                              |
| Continental                          | 3,931 (18.8)                 | 1,443 (13.4)                                      | 2,488 (24.5)                                     |                                   |
| Midwest                              | 6,723 (32.2)                 | 3,918 (36.5)                                      | 2,805 (27.6)                                     |                                   |
| North Atlantic                       | 3,015 (14.4)                 | 1,962 (18.3)                                      | 1,053 (10.4)                                     |                                   |
| Pacific                              | 3,007 (14.4)                 | 1,664 (15.5)                                      | 1,343 (13.2)                                     |                                   |
| Southeast                            | 4,207 (20.1)                 | 1,750 (16.3)                                      | 2,457 (24.2)                                     |                                   |
| Academic Affiliation                 | 39,096 (96.0)                | 9,977 (92.9)                                      | 10,146 (100.0)                                   | 39.0                              |
| Fellows Listed at Site               | 37,319 (91.7)                | 8,841 (82.3)                                      | 9,950 (98.1)                                     | 54.9                              |
| Operating Beds in FY2012 (mean (sd)) | 186.6 (73.1)                 | 167.9 (74.1)                                      | 175.2 (58.5)                                     | 10.9                              |
| Operating Beds in FY2018 (mean (sd)) | 178.1 (72.2)                 | 159.5 (73.2)                                      | 167.8 (58.3)                                     | 12.6                              |

**Table S5. Crude bleeding events stratified by instrumental variable.**

| IV Status             | ACD Status | Number of Patients | Number of Bleeding Events | Bleeding Event Rate (per 100) |
|-----------------------|------------|--------------------|---------------------------|-------------------------------|
| High-ACD use operator | Overall    | 10,737             | 380                       | 3.54                          |
|                       | No ACD     | 672                | 43                        | 6.40                          |
|                       | ACD used   | 10,065             | 337                       | 3.35                          |
| Low-ACD use operator  | Overall    | 10,146             | 363                       | 3.58                          |
|                       | No ACD     | 7,709              | 293                       | 3.80                          |
|                       | ACD used   | 2,437              | 70                        | 2.87                          |



Figure S1. Histogram of unmatched (A) and matched (B) propensity scores.

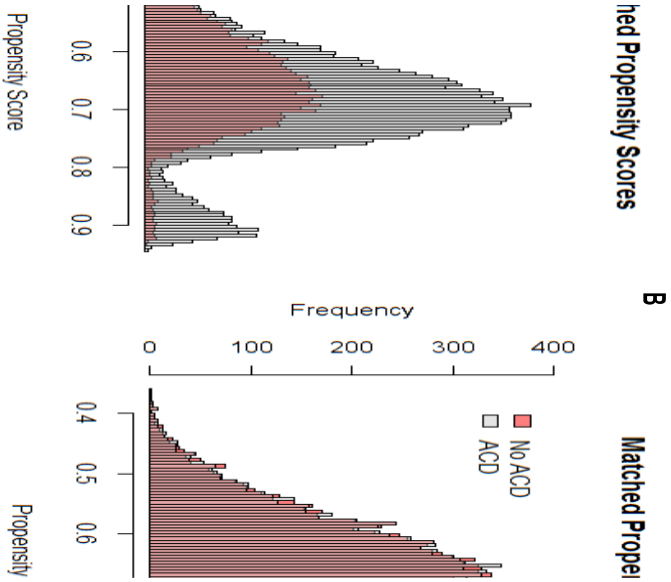

Figure S2. Histogram of proportion of providers previous twenty cases that utilized a closure device.

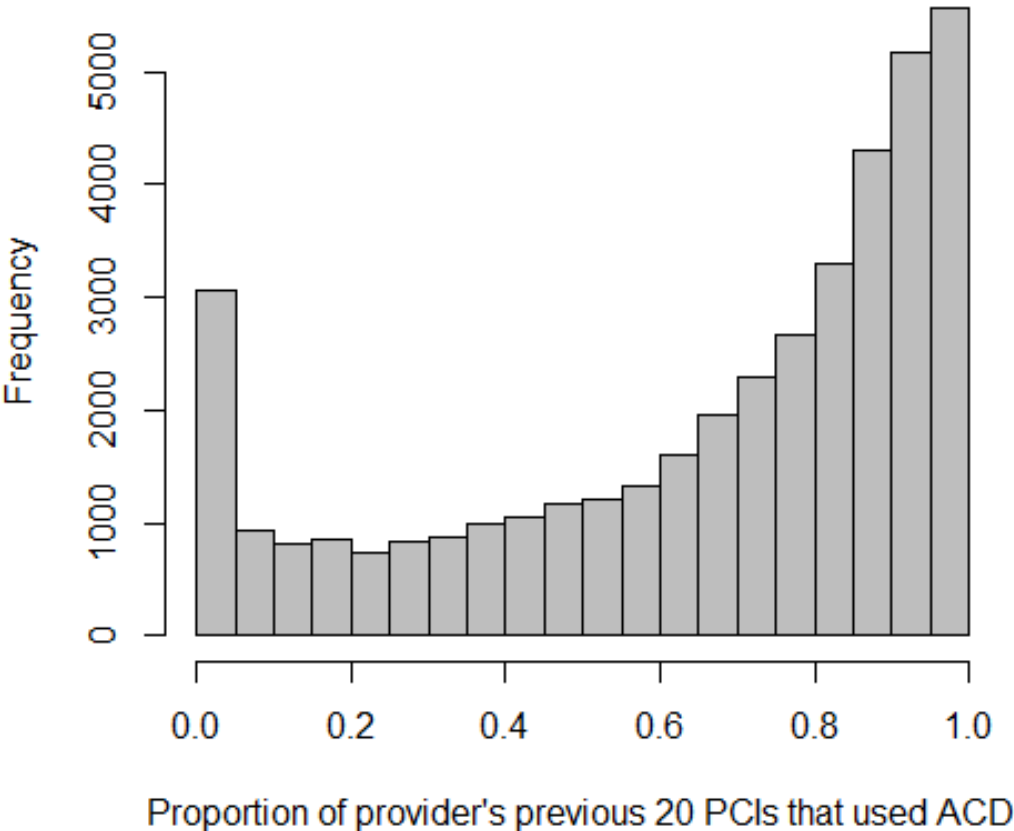

Supplement: JAH3-9-e015223-s001.pdf [file JAH3-9-e015223-s001.pdf]
